# Supplementary material for: Interaction between [(η6-p-cym)M(H2O)3]2+ (MII = Ru, Os) or [(η5-Cp*)M(H2O)3]2+ (MIII = Rh, Ir) and Phosphonate Derivatives of Iminodiacetic Acid: A Solution Equilibrium and DFT Study
Source: MDPI journal article supplement (doi:10.3390/molecules28031477), 2023-02-03
Supplement: s1 [file s1]

Supplementary Materials

# Interaction between $[(\eta^6\text{-}p\text{-cym})\text{M}(\text{H}_2\text{O})_3]^{2+}$ ( $\text{M}^{\text{II}} = \text{Ru}, \text{Os}$ ) or $[(\eta^5\text{-Cp}^*)\text{M}(\text{H}_2\text{O})_3]^{2+}$ ( $\text{M}^{\text{III}} = \text{Rh}, \text{Ir}$ ) and Phosphonate Derivatives of Iminodiacetic Acid: A Solution Equilibrium and DFT Study

Linda Bíró, Botond Tóth, Norbert Lihi, Etelka Farkas and Péter Buglyó \*

Department of Inorganic & Analytical Chemistry, Faculty of Science and Technology, University of Debrecen, H-4032 Debrecen, Egyetem tér 1, Hungary; linda.biro@science.unideb.hu (L.B.); toth.botond94@gmail.com (B.T.); lihi.norbert@science.unideb.hu (N.L.); efarkas@science.unideb.hu (E.F.)

\* Correspondence: buglyo@science.unideb.hu

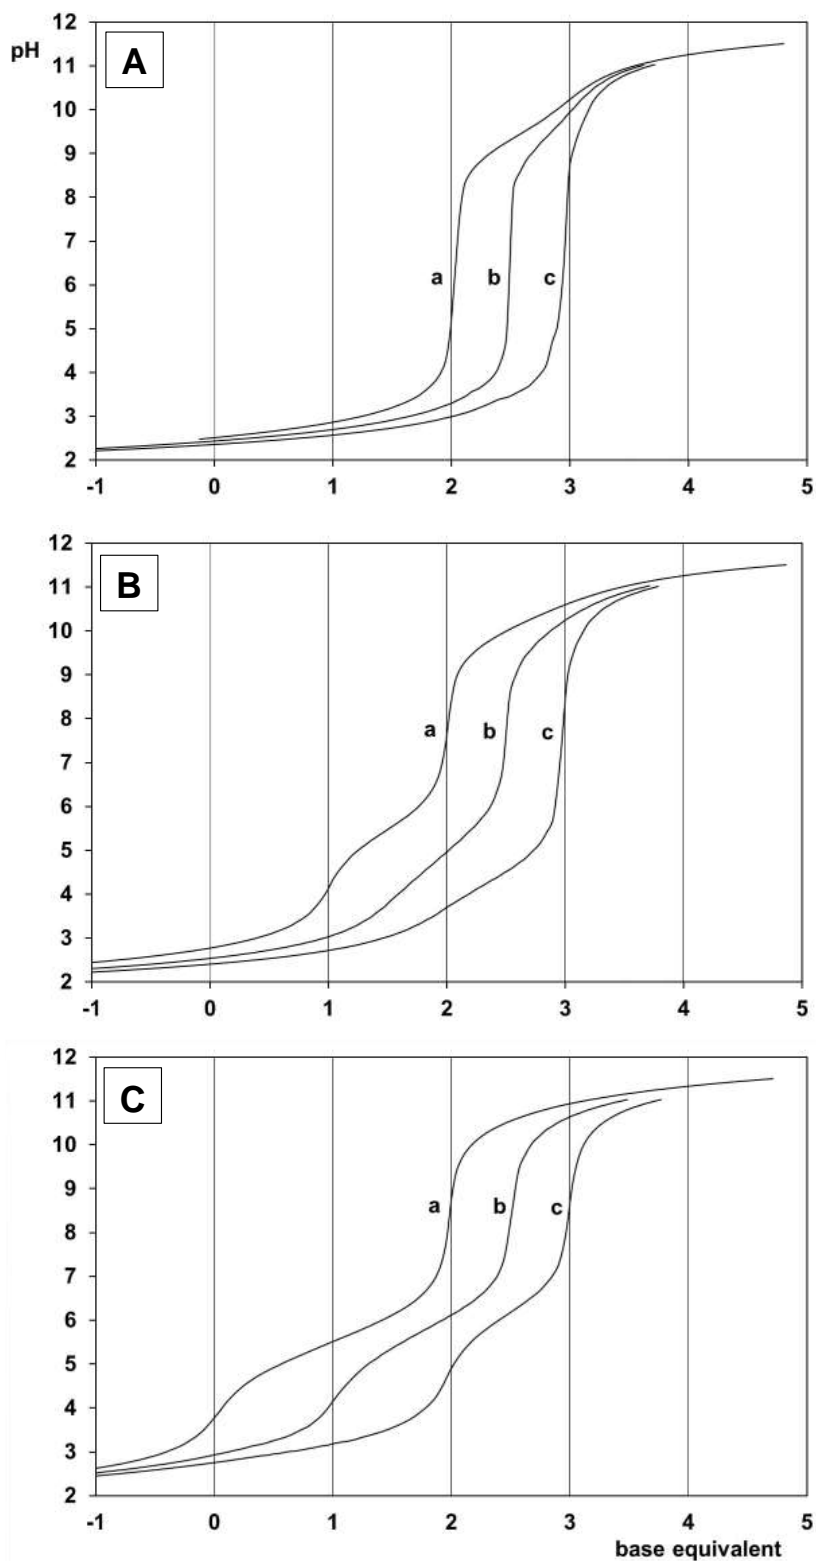

**Figure S1.** pH-potentiometric titration curves with  $Ida^{2-}$  (A),  $IdaP^{3-}$  (B) and  $Ida2P^{4-}$  (C) for the  $H^+$  – ligand system (a), and  $[(\eta^6\text{-}p\text{-cym})Ru]^{2+}$  – ligand systems at 1:2 (b) and 1:1 (c) ratios. Negative base equivalent refers to an excess of acid in the sample.  $I = 0.20\text{ M KCl}$ ,  $t = 25.0\text{ }^\circ\text{C}$ .

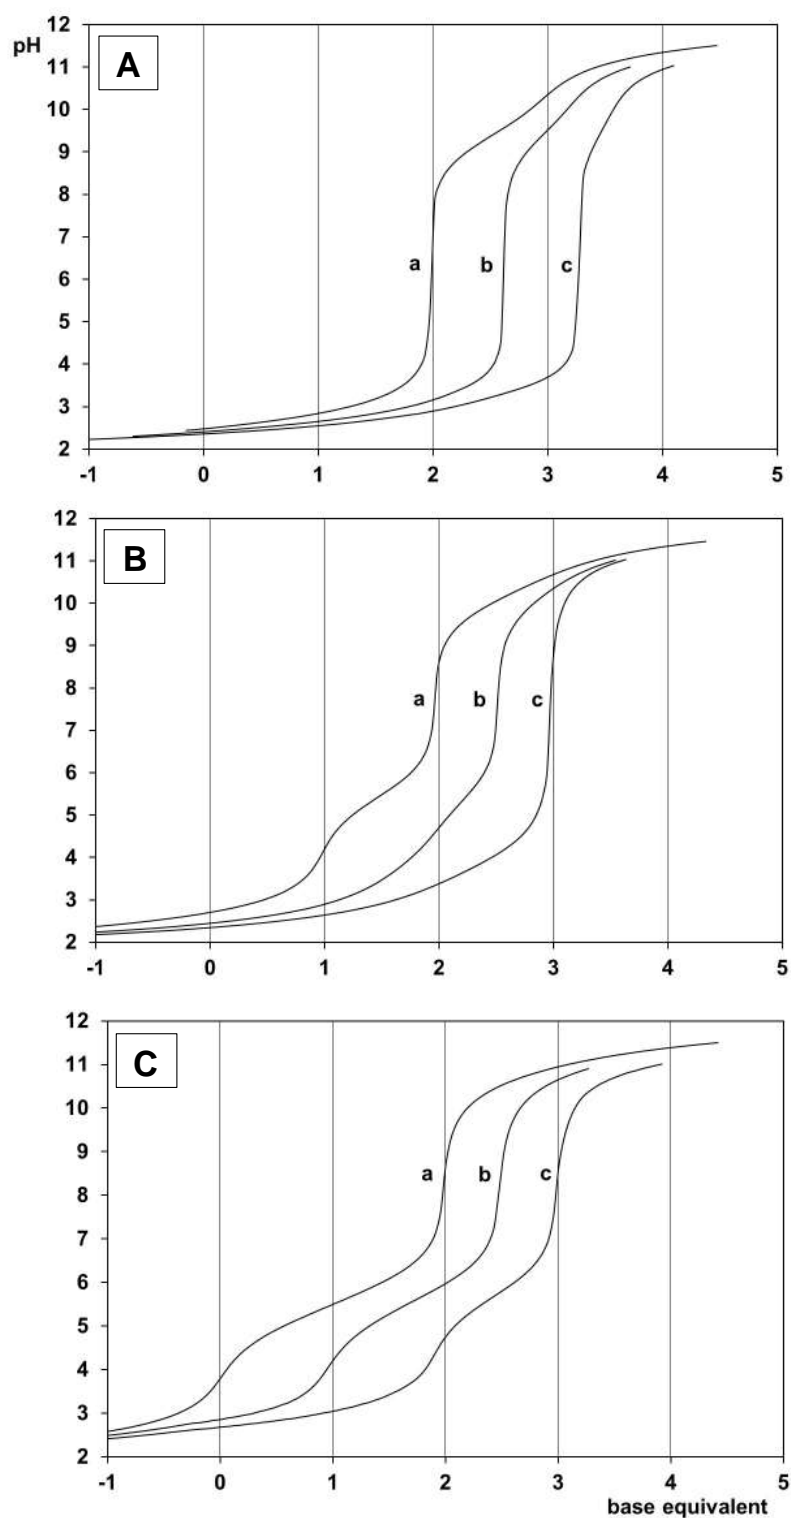

**Figure S2.** pH-potentiometric titration curves with  $\text{Ida}^{2-}$  (A),  $\text{IdaP}^{3-}$  (B) and  $\text{Ida2P}^{4-}$  (C) for the  $\text{H}^+$  – ligand system (a), and  $[(\eta^6\text{-}p\text{-cym})\text{Os}]^{2+}$  – ligand systems at 1:2 (b) and 1:1 (c) ratios. Negative base equivalent refers to an excess of acid in the sample.  $I = 0.20 \text{ M KCl}$ ,  $t = 25.0 \text{ }^\circ\text{C}$ .

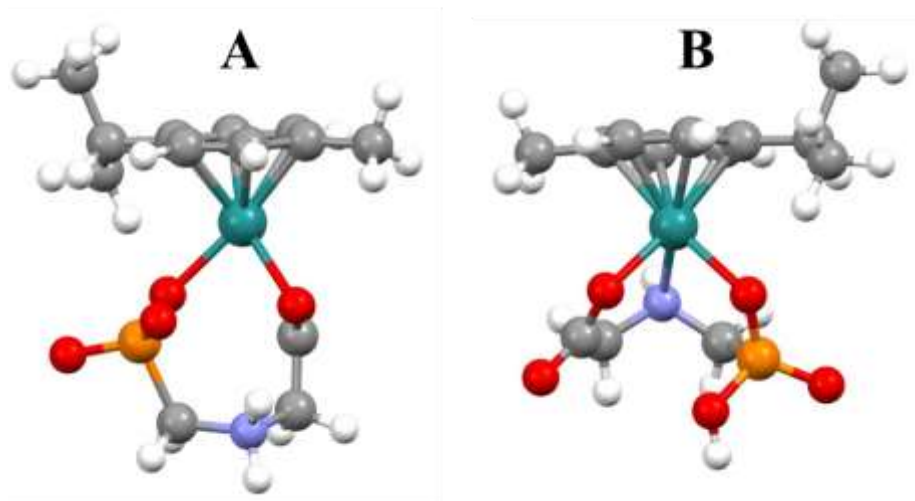

**Figure S3.** Optimized structures of the two coordination isomers of  $[(\eta^6\text{-}p\text{-cym})\text{Ru}(\text{HIdaP})]$  **A** and **B**.

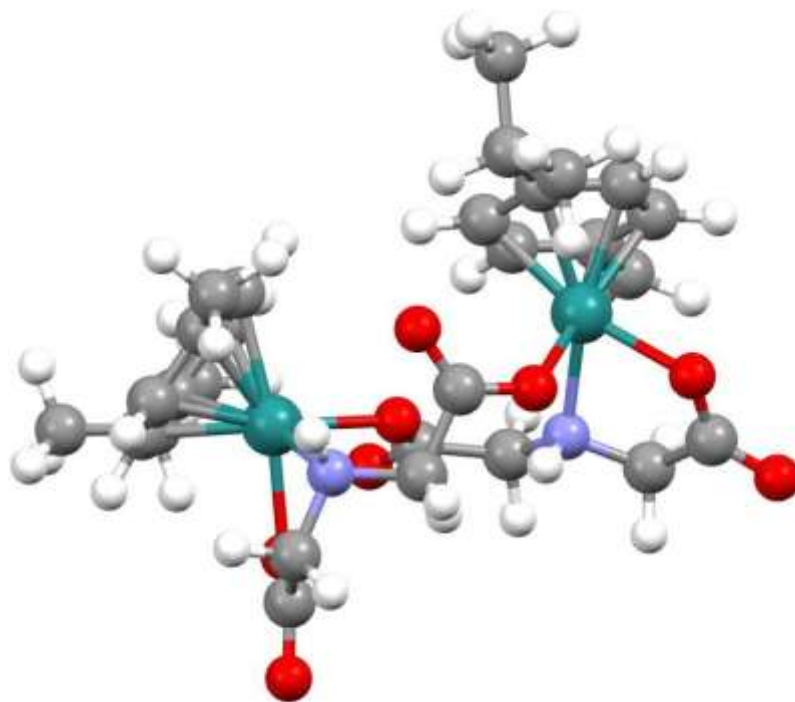

**Figure S4.** Optimized structure of the  $[\text{M}_2\text{L}_2]$  type dimer assumed in the  $[(\eta^6\text{-}p\text{-cym})\text{Ru}]^{2+}\text{--IdaP}^{3-}$  system.

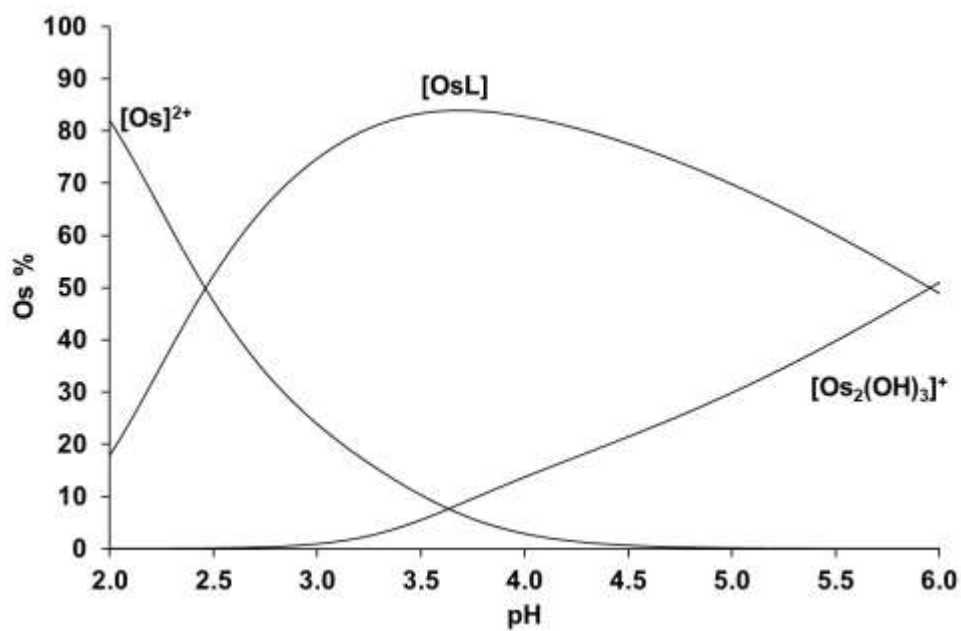

**Figure S5.** Concentration distribution curves calculated for the  $[(\eta^6\text{-}p\text{-cym})\text{Os}]^{2+} - \text{Ida}^{2-}$  system at 1:1 ratio ( $c = 3 \text{ mM}$ ,  $I = 0.20 \text{ M KCl}$ ).  $[\text{Os}]^{2+}$  stands for the  $[(\eta^6\text{-}p\text{-cym})\text{Os}]^{2+}$  entity.

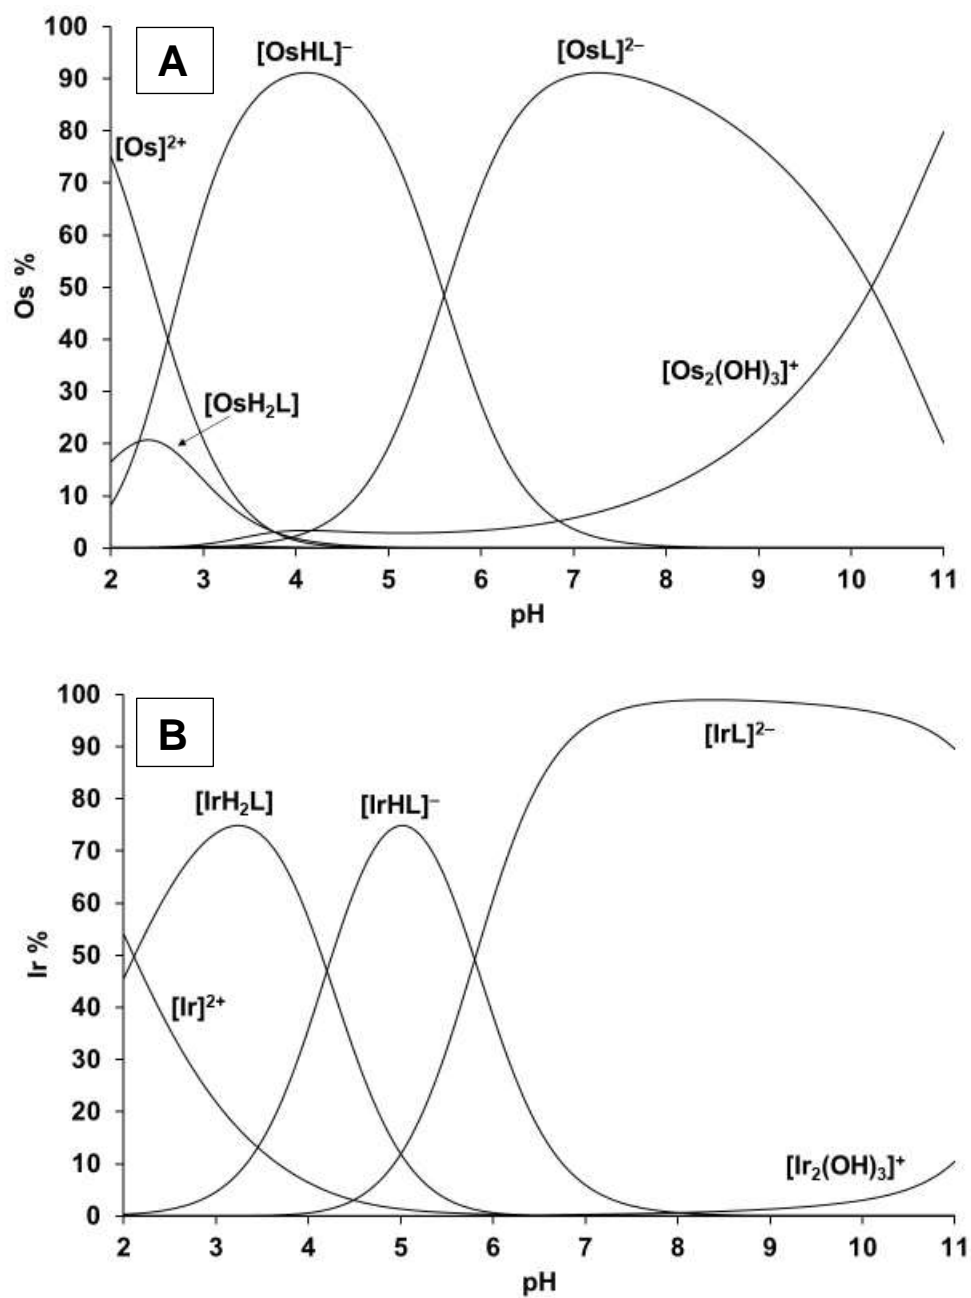

**Figure S6.** Concentration distribution curves calculated for the  $[(\eta^6\text{-}p\text{-cym})\text{Os}]^{2+} - \text{Ida}2\text{P}^{4-}$  (A) and  $[(\eta^5\text{-Cp}^*)\text{Ir}]^{2+} - \text{Ida}2\text{P}^{4-}$  (B) system at 1:1 ratio ( $c_{\text{Os}} = 3 \text{ mM}$ ,  $c_{\text{Ir}} = 0.8 \text{ mM}$ ,  $I = 0.20 \text{ M KCl}$ ).  $[\text{Os}]^{2+}$  and  $[\text{Ir}]^{2+}$  stand for the  $[(\eta^6\text{-}p\text{-cym})\text{Os}]^{2+}$  and  $[(\eta^5\text{-Cp}^*)\text{Ir}]^{2+}$  entities, respectively.

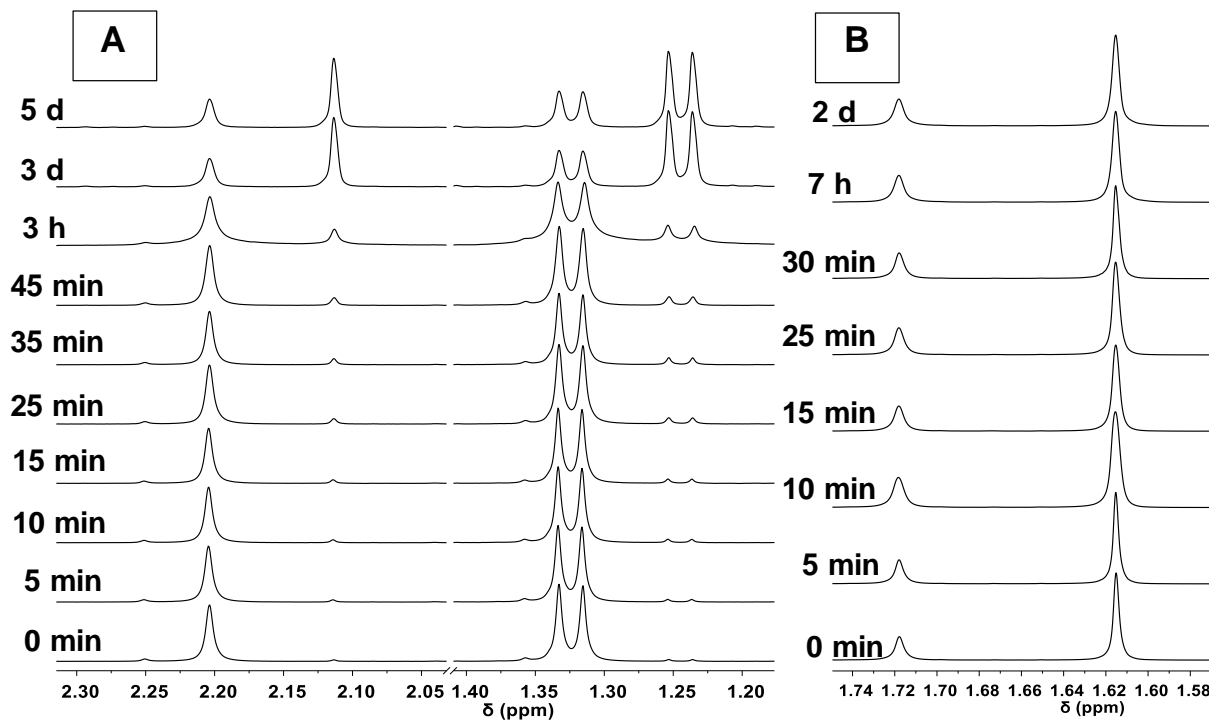

**Figure S7.** Time dependence of the high field region of  $^1\text{H}$  NMR spectra recorded in the  $[(\eta^6\text{-}p\text{-cym})\text{Ru}]^{2+} - \text{Ida}^{2-}$  (A) and  $[(\eta^5\text{-Cp}^*)\text{Rh}]^{2+} - \text{Ida}^{2-}$  (B) 1:1 systems in  $\text{D}_2\text{O}$  ( $c_{\text{M}} = 5 \text{ mM}$ ,  $I = 0.20 \text{ M KCl}$ ).  $\text{pH} = 2.17$ .

**Table S1.** Cartesian coordinates and IR spectrum of  $[(\eta^6\text{-}p\text{-cym})\text{Ru}(\text{HIdaP})]$  complex (Isomer A).

|                                                  |                     |
|--------------------------------------------------|---------------------|
| Electronic Energy (Eh)                           | -1373.8499679000001 |
| Sum of electronic and zero-point Energies (Eh)   | -1373.517329        |
| Sum of electronic and thermal Energies (Eh)      | -1373.495354        |
| Sum of electronic and enthalpy Energies (Eh)     | -1373.494409        |
| Sum of electronic and thermal Free Energies (Eh) | -1373.56835         |
| Number of Imaginary Frequencies                  | 0                   |

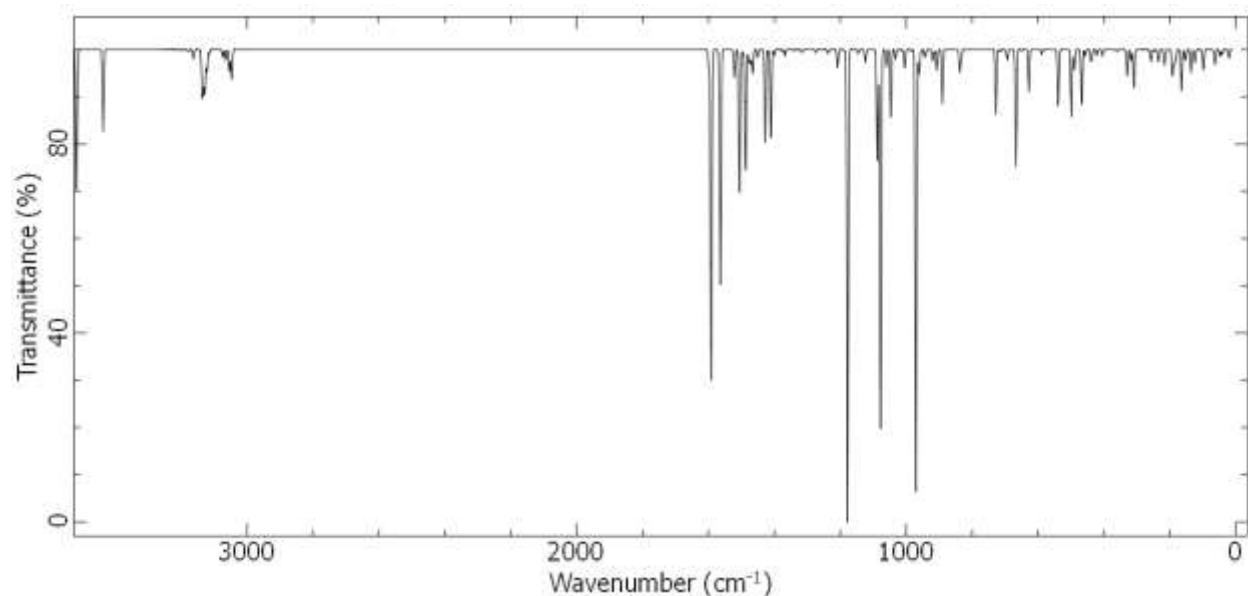

### Molecular Geometry in Cartesian Coordinates

|    |          |           |           |
|----|----------|-----------|-----------|
| Ru | 0.479221 | -0.588885 | -0.122054 |
| C  | 1.833934 | 0.249445  | 1.328976  |
| C  | 1.612153 | -1.100787 | 1.645343  |
| C  | 1.835715 | -2.129555 | 0.688021  |
| C  | 2.274029 | -1.744144 | -0.587531 |
| C  | 2.492419 | -0.378254 | -0.912390 |
| C  | 2.289469 | 0.637070  | 0.038352  |
| H  | 1.567940 | 1.012558  | 2.047827  |
| H  | 1.167925 | -1.354242 | 2.598677  |
| H  | 2.350084 | -2.488446 | -1.368607 |
| H  | 2.734961 | -0.122800 | -1.933705 |
| C  | 2.467135 | 2.101374  | -0.269203 |
| H  | 1.728595 | 2.634207  | 0.334751  |
| C  | 2.234048 | 2.457399  | -1.730904 |
| H  | 1.265345 | 2.094937  | -2.079107 |
| H  | 2.254342 | 3.541775  | -1.847296 |
| H  | 3.012003 | 2.042307  | -2.375388 |
| C  | 3.862578 | 2.524815  | 0.194243  |
| H  | 3.999867 | 3.595987  | 0.038532  |
| H  | 4.011562 | 2.310922  | 1.254299  |
| H  | 4.631274 | 1.994897  | -0.373759 |



|   |           |           |           |
|---|-----------|-----------|-----------|
| C | 1.521193  | -3.553287 | 1.010006  |
| H | 2.382366  | -4.014786 | 1.498355  |
| H | 0.672091  | -3.617747 | 1.689790  |
| H | 1.297830  | -4.116087 | 0.104644  |
| C | -1.813203 | -1.422131 | -0.931754 |
| O | -0.978391 | -1.308132 | -1.853263 |
| O | -1.456186 | -1.617230 | 0.263500  |
| C | -3.288317 | -1.227843 | -1.183031 |
| H | -3.790040 | -2.194577 | -1.176280 |
| H | -3.469667 | -0.726826 | -2.129032 |
| N | -3.864465 | -0.403298 | -0.087537 |
| H | -4.877420 | -0.508135 | -0.117006 |
| C | -3.535442 | 1.058955  | -0.131501 |
| H | -4.324169 | 1.560512  | 0.427254  |
| H | -3.597831 | 1.376661  | -1.170794 |
| P | -1.932400 | 1.591335  | 0.627948  |
| O | -2.034448 | 3.095488  | 0.577901  |
| O | -1.877497 | 0.960679  | 1.999167  |
| O | -0.807763 | 1.093340  | -0.314434 |
| H | -3.545520 | -0.788638 | 0.806058  |

**Table S2.** Cartesian coordinates and IR spectrum of  $[(\eta^6\text{-}p\text{-cym})\text{Ru}(\text{HIdaP})]$  complex (Isomer B).

|                                                  |                |
|--------------------------------------------------|----------------|
| Electronic Energy (Eh)                           | -1373.87436764 |
| Sum of electronic and zero-point Energies (Eh)   | -1373.543176   |
| Sum of electronic and thermal Energies (Eh)      | -1373.521365   |
| Sum of electronic and enthalpy Energies (Eh)     | -1373.520421   |
| Sum of electronic and thermal Free Energies (Eh) | -1373.593119   |
| Number of Imaginary Frequencies                  | 0              |

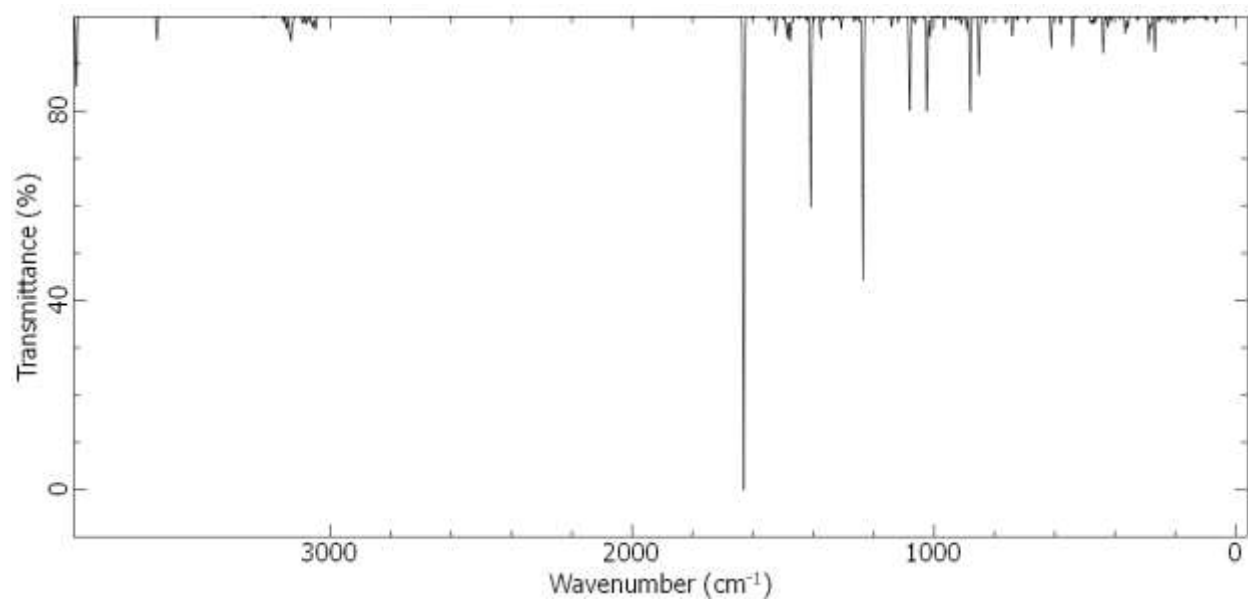

**Molecular Geometry in Cartesian Coordinates**

|    |           |           |           |
|----|-----------|-----------|-----------|
| Ru | -0.212064 | 0.483883  | -0.049217 |
| C  | -1.934138 | 0.392768  | 1.297494  |
| C  | -1.291465 | 1.650075  | 1.403676  |
| C  | -1.060492 | 2.464225  | 0.273077  |
| C  | -1.503119 | 1.969304  | -0.982116 |
| C  | -2.135294 | 0.721690  | -1.105573 |
| C  | -2.353841 | -0.089063 | 0.041362  |
| H  | -2.037495 | -0.232943 | 2.173042  |
| H  | -0.883848 | 1.953965  | 2.359643  |
| H  | -1.250196 | 2.520222  | -1.878820 |
| H  | -2.388125 | 0.357321  | -2.089520 |
| C  | -2.995444 | -1.452167 | -0.042732 |
| H  | -2.459681 | -2.091763 | 0.663013  |
| C  | -2.930679 | -2.092337 | -1.422814 |
| H  | -1.910711 | -2.127661 | -1.806198 |
| H  | -3.307473 | -3.114308 | -1.363629 |
| H  | -3.552452 | -1.553312 | -2.141086 |
| C  | -4.446769 | -1.326118 | 0.429770  |
| H  | -4.929050 | -2.304762 | 0.413900  |
| H  | -4.504695 | -0.931389 | 1.445366  |
| H  | -5.007157 | -0.659654 | -0.230632 |
| C  | -0.325555 | 3.761222  | 0.377892  |
| H  | -1.036179 | 4.587076  | 0.454583  |
| H  | 0.310948  | 3.774032  | 1.262108  |
| H  | 0.291619  | 3.925823  | -0.505252 |
| C  | 2.565126  | 1.205362  | -0.743565 |
| O  | 3.581729  | 1.545880  | -1.354182 |
| O  | 1.424319  | 1.042614  | -1.293789 |
| C  | 2.636908  | 1.023031  | 0.761104  |
| H  | 2.636642  | 2.026025  | 1.191182  |
| H  | 3.578396  | 0.543508  | 1.028430  |
| N  | 1.488765  | 0.285823  | 1.315680  |
| H  | 1.220615  | 0.736059  | 2.181284  |
| C  | 1.749005  | -1.133471 | 1.625089  |
| H  | 0.989447  | -1.462170 | 2.335557  |
| H  | 2.730414  | -1.268588 | 2.085421  |
| P  | 1.552710  | -2.175203 | 0.154065  |
| O  | 1.514779  | -3.615113 | 0.522543  |
| O  | 2.818715  | -1.848688 | -0.783448 |
| O  | 0.367667  | -1.576601 | -0.580188 |
| H  | 3.624655  | -2.292886 | -0.497030 |

**Table S3.** Cartesian coordinates and the IR spectrum of  $[(\eta^6\text{-}p\text{-cym})\text{Ru}(\text{Ida})]$  complex.

|                                                  |                    |
|--------------------------------------------------|--------------------|
| Electronic Energy (Eh)                           | -994.6751368219999 |
| Sum of electronic and zero-point Energies (Eh)   | -994.355145        |
| Sum of electronic and thermal Energies (Eh)      | -994.335249        |
| Sum of electronic and enthalpy Energies (Eh)     | -994.334305        |
| Sum of electronic and thermal Free Energies (Eh) | -994.403536        |
| Number of Imaginary Frequencies                  | 0                  |

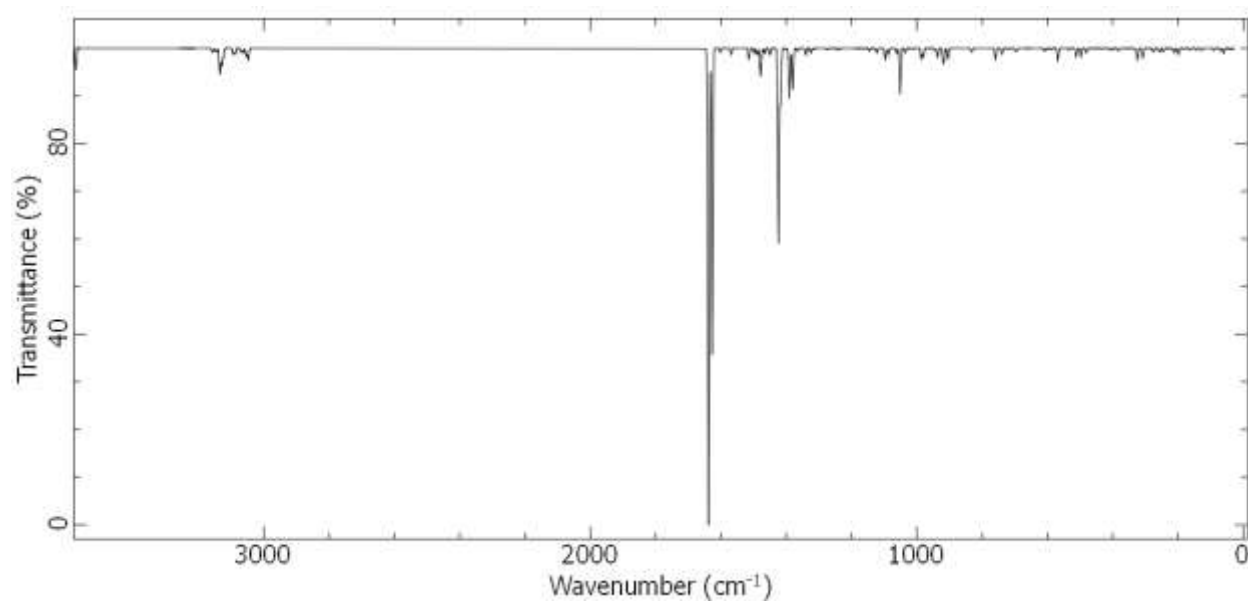

### Molecular Geometry in Cartesian Coordinates

|    |           |           |           |
|----|-----------|-----------|-----------|
| Ru | -0.020231 | 0.200561  | -0.041185 |
| C  | 1.724562  | 0.433190  | -1.337523 |
| C  | 0.825829  | 1.476436  | -1.584740 |
| C  | 0.349742  | 2.306991  | -0.526317 |
| C  | 0.824322  | 2.040260  | 0.767077  |
| C  | 1.753253  | 0.991789  | 1.020509  |
| C  | 2.202775  | 0.167873  | -0.018145 |
| H  | 2.006598  | -0.228058 | -2.145573 |
| H  | 0.415707  | 1.600303  | -2.578515 |
| H  | 0.414627  | 2.592059  | 1.602415  |
| H  | 2.032087  | 0.780565  | 2.042361  |
| C  | 3.128776  | -1.001526 | 0.199932  |
| H  | 2.852449  | -1.754620 | -0.542365 |
| C  | 3.010296  | -1.630131 | 1.581431  |
| H  | 1.975967  | -1.893304 | 1.810099  |
| H  | 3.611265  | -2.539748 | 1.619978  |
| H  | 3.376763  | -0.959444 | 2.361602  |
| C  | 4.561934  | -0.551053 | -0.089720 |
| H  | 5.245612  | -1.397255 | -0.004647 |
| H  | 4.653156  | -0.137744 | -1.095987 |
| H  | 4.873745  | 0.214465  | 0.625065  |
| C  | -0.658630 | 3.377838  | -0.790409 |
| H  | -0.152829 | 4.278198  | -1.146143 |
| H  | -1.365206 | 3.063927  | -1.559547 |
| H  | -1.207372 | 3.627527  | 0.116707  |
| C  | -2.550088 | 0.104577  | 1.462371  |
| O  | -3.407732 | 0.044758  | 2.347813  |
| O  | -1.307479 | -0.120832 | 1.649653  |
| C  | -2.951094 | 0.520929  | 0.060054  |
| H  | -2.970093 | 1.612666  | 0.051891  |
| H  | -3.953529 | 0.160309  | -0.171489 |
| N  | -1.973929 | 0.078800  | -0.945872 |
| H  | -2.008904 | 0.727228  | -1.722487 |

|   |           |           |           |
|---|-----------|-----------|-----------|
| C | -2.197731 | -1.283030 | -1.462087 |
| H | -1.969400 | -1.286805 | -2.529038 |
| H | -3.239392 | -1.580671 | -1.343503 |
| C | -1.292309 | -2.327184 | -0.832323 |
| O | -0.247312 | -1.905188 | -0.232141 |
| O | -1.571652 | -3.520943 | -0.972607 |

**Table S4.** Cartesian coordinates and the IR spectrum of the  $((\eta^6\text{-}p\text{-cym})\text{Ru})_2(\text{Ida})_2$  complex.

|                                                  |                |
|--------------------------------------------------|----------------|
| Electronic Energy (Eh)                           | -1989.82018446 |
| Sum of electronic and zero-point Energies (Eh)   | -1989.17487600 |
| Sum of electronic and thermal Energies (Eh)      | -1989.13453002 |
| Sum of electronic and enthalpy Energies (Eh)     | -1989.13358581 |
| Sum of electronic and thermal Free Energies (Eh) | -1989.23925740 |
| Number of Imaginary Frequencies                  | 0              |

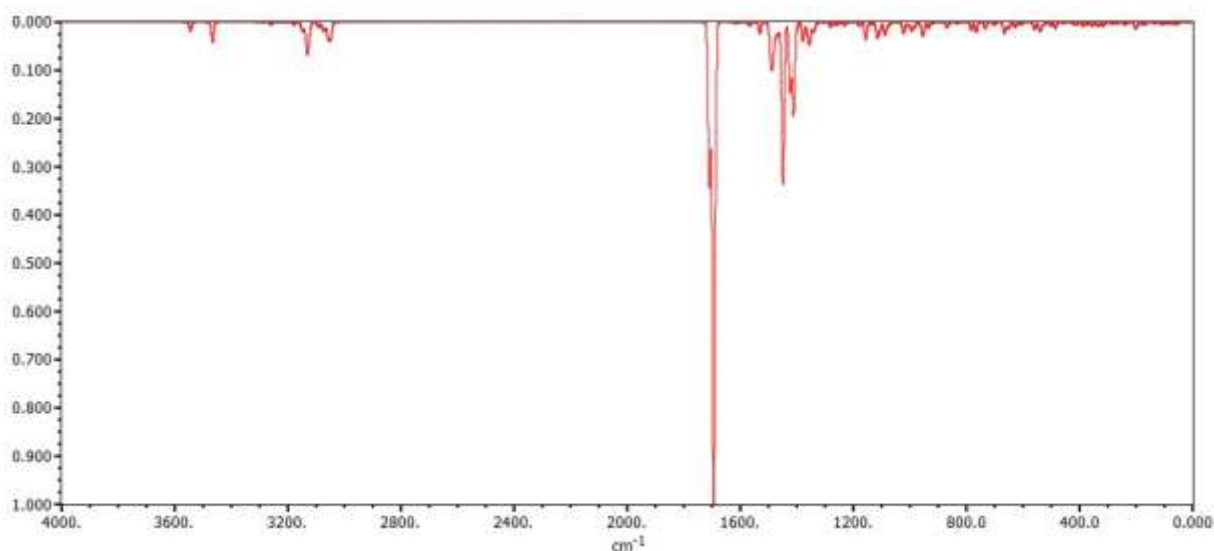

### Molecular Geometry in Cartesian Coordinates

|    |         |          |          |
|----|---------|----------|----------|
| Ru | 2.54817 | 0.05796  | 0.18195  |
| C  | 4.54873 | 0.82156  | 0.26772  |
| C  | 3.66676 | 1.90721  | 0.15324  |
| C  | 2.53781 | 2.05021  | 1.00335  |
| C  | 2.41488 | 1.11698  | 2.04977  |
| C  | 3.30217 | 0.02884  | 2.20109  |
| C  | 4.37276 | -0.13462 | 1.30350  |
| H  | 5.33320 | 0.67899  | -0.46390 |
| H  | 3.75235 | 2.55520  | -0.71178 |
| H  | 1.52361 | 1.13532  | 2.66101  |
| H  | 3.08696 | -0.72232 | 2.94203  |
| C  | 5.29191 | -1.32429 | 1.36118  |
| H  | 5.53670 | -1.57828 | 0.32581  |

|    |          |          |          |
|----|----------|----------|----------|
| C  | 4.66312  | -2.55497 | 2.00199  |
| H  | 3.70303  | -2.78697 | 1.54072  |
| H  | 5.32242  | -3.41331 | 1.86448  |
| H  | 4.51481  | -2.42135 | 3.07599  |
| C  | 6.57605  | -0.91181 | 2.08345  |
| H  | 7.27936  | -1.74566 | 2.10998  |
| H  | 7.06261  | -0.06913 | 1.58845  |
| H  | 6.35704  | -0.62048 | 3.11395  |
| C  | 1.61788  | 3.22132  | 0.88987  |
| H  | 2.07469  | 4.09311  | 1.36272  |
| H  | 1.40251  | 3.45788  | -0.15019 |
| H  | 0.67907  | 3.02277  | 1.40479  |
| C  | -3.92692 | -2.07623 | -1.12058 |
| O  | -3.95288 | -0.79916 | -1.18462 |
| O  | -4.62465 | -2.82313 | -1.79892 |
| C  | -2.96438 | -2.64303 | -0.09424 |
| H  | -2.54888 | -3.58967 | -0.44386 |
| H  | -3.53325 | -2.83297 | 0.81970  |
| N  | -1.90719 | -1.67020 | 0.20719  |
| H  | -1.31952 | -1.57289 | -0.62028 |
| C  | -1.05845 | -2.13400 | 1.30066  |
| H  | -0.73623 | -3.16340 | 1.10254  |
| H  | -1.62399 | -2.13882 | 2.22715  |
| C  | 0.21221  | -1.31922 | 1.48010  |
| O  | 0.70738  | -1.28380 | 2.60337  |
| O  | 0.67033  | -0.80207 | 0.40914  |
| C  | -0.37428 | 0.78543  | -1.70710 |
| O  | -1.51064 | 0.21926  | -1.56530 |
| O  | -0.09486 | 1.95861  | -1.48188 |
| C  | 0.68902  | -0.12181 | -2.29440 |
| H  | 0.61153  | -0.06134 | -3.38536 |
| H  | 0.51820  | -1.14978 | -1.98833 |
| N  | 2.03118  | 0.29045  | -1.87519 |
| H  | 2.13268  | 1.26991  | -2.12145 |
| C  | 3.03905  | -0.50892 | -2.58957 |
| H  | 4.00605  | -0.00740 | -2.53032 |
| H  | 2.78223  | -0.64021 | -3.64152 |
| C  | 3.16344  | -1.85656 | -1.89282 |
| O  | 2.89718  | -1.82801 | -0.64252 |
| O  | 3.50805  | -2.85686 | -2.51472 |
| Ru | -2.75892 | 0.25689  | 0.13024  |
| C  | -2.08881 | 2.19670  | 0.76715  |
| C  | -1.95293 | 1.30103  | 1.83271  |
| C  | -3.06963 | 0.53929  | 2.27251  |
| C  | -4.28186 | 0.65253  | 1.56727  |
| C  | -4.41041 | 1.58658  | 0.50775  |
| C  | -3.30723 | 2.31613  | 0.03974  |
| H  | -1.20382 | 2.66020  | 0.35803  |
| H  | -0.99032 | 1.17210  | 2.30917  |
| H  | -5.11474 | 0.01580  | 1.83310  |
| H  | -5.31302 | 1.55890  | -0.08792 |
| C  | -3.38617 | 3.22372  | -1.16204 |
| H  | -2.35328 | 3.43467  | -1.44912 |
| C  | -4.06417 | 4.53679  | -0.77546 |
| H  | -3.54968 | 5.02014  | 0.05761  |
| H  | -4.06804 | 5.22656  | -1.62143 |
| H  | -5.10126 | 4.36052  | -0.47768 |

|   |          |          |          |
|---|----------|----------|----------|
| C | -4.07052 | 2.55201  | -2.34890 |
| H | -3.99250 | 3.18367  | -3.23530 |
| H | -3.60155 | 1.59070  | -2.56286 |
| H | -5.13261 | 2.37929  | -2.15905 |
| C | -2.96483 | -0.37579 | 3.44889  |
| H | -1.92850 | -0.62032 | 3.67722  |
| H | -3.38754 | 0.13049  | 4.31962  |
| H | -3.52876 | -1.29581 | 3.29357  |

**Table S5.** Cartesian coordinates and the IR spectrum of  $[(\eta^6\text{-}p\text{-cym})\text{Ru}(\text{IdaP})]^-$  complex.

|                                                  |               |
|--------------------------------------------------|---------------|
| Electronic Energy (Eh)                           | -1373.4073006 |
| Sum of electronic and zero-point Energies (Eh)   | -1373.087982  |
| Sum of electronic and thermal Energies (Eh)      | -1373.066682  |
| Sum of electronic and enthalpy Energies (Eh)     | -1373.065738  |
| Sum of electronic and thermal Free Energies (Eh) | -1373.138295  |
| Number of Imaginary Frequencies                  | 0             |

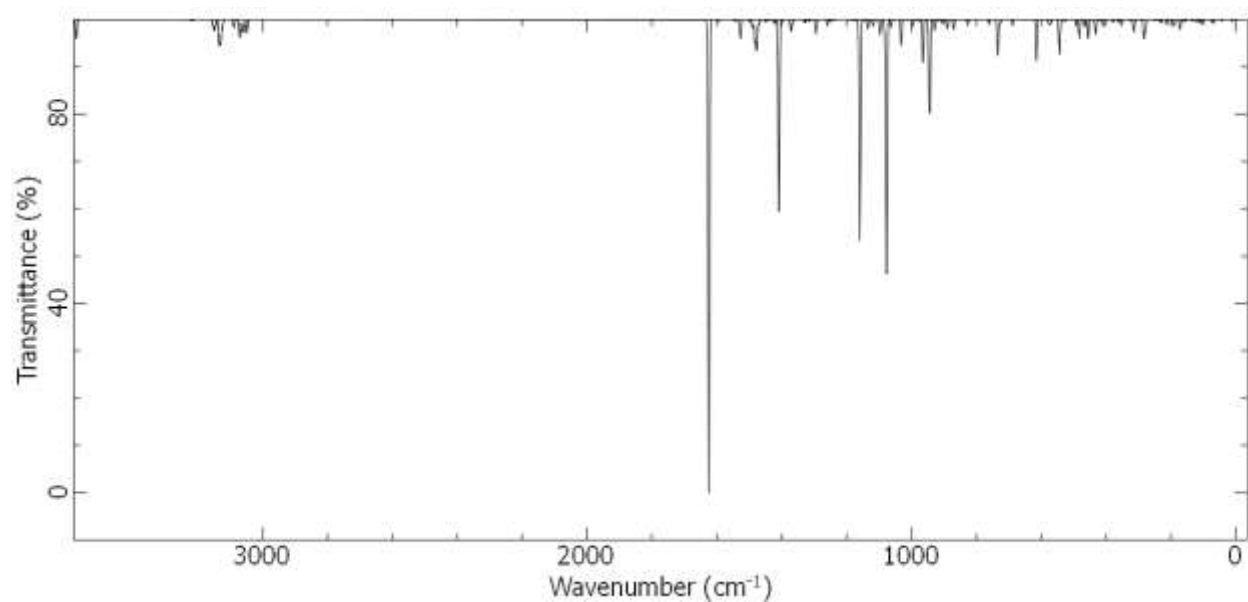

### Molecular Geometry in Cartesian Coordinates

|    |           |           |           |
|----|-----------|-----------|-----------|
| Ru | -0.177670 | 0.464656  | -0.043819 |
| C  | -1.898849 | 0.402363  | 1.298278  |
| C  | -1.214890 | 1.633002  | 1.440352  |
| C  | -0.955633 | 2.474292  | 0.335100  |
| C  | -1.402170 | 2.023833  | -0.931768 |
| C  | -2.094211 | 0.807102  | -1.093985 |
| C  | -2.340862 | -0.024926 | 0.026474  |
| H  | -2.028104 | -0.242669 | 2.156082  |
| H  | -0.799683 | 1.894510  | 2.405783  |
| H  | -1.124965 | 2.588370  | -1.812848 |
| H  | -2.365169 | 0.484857  | -2.087752 |
| C  | -3.032814 | -1.360664 | -0.089705 |

|   |           |           |           |
|---|-----------|-----------|-----------|
| H | -2.515154 | -2.037396 | 0.594642  |
| C | -2.997260 | -1.966010 | -1.486070 |
| H | -1.979865 | -2.029257 | -1.873223 |
| H | -3.411834 | -2.974522 | -1.452871 |
| H | -3.599698 | -1.384733 | -2.187665 |
| C | -4.475493 | -1.197608 | 0.397268  |
| H | -4.990868 | -2.158851 | 0.364027  |
| H | -4.512602 | -0.824304 | 1.421981  |
| H | -5.018473 | -0.497809 | -0.242937 |
| C | -0.182562 | 3.746215  | 0.477695  |
| H | -0.865896 | 4.593066  | 0.571770  |
| H | 0.449475  | 3.717401  | 1.364922  |
| H | 0.445620  | 3.913572  | -0.397389 |
| C | 2.594792  | 1.083995  | -0.841127 |
| O | 3.607888  | 1.370961  | -1.487445 |
| O | 1.438479  | 0.936166  | -1.359581 |
| C | 2.693359  | 0.965173  | 0.667504  |
| H | 2.729117  | 1.986541  | 1.051401  |
| H | 3.627841  | 0.472734  | 0.936142  |
| N | 1.540631  | 0.283763  | 1.276356  |
| H | 1.311389  | 0.774046  | 2.131008  |
| C | 1.765785  | -1.136401 | 1.619350  |
| H | 0.993800  | -1.417097 | 2.336654  |
| H | 2.741304  | -1.268062 | 2.094579  |
| P | 1.570306  | -2.209395 | 0.146627  |
| O | 1.327715  | -3.618185 | 0.638797  |
| O | 2.789433  | -2.043002 | -0.735423 |
| O | 0.291122  | -1.593797 | -0.493396 |

**Table S6.** Cartesian coordinates and IR spectrum of  $[(\eta^6\text{-}p\text{-cym})\text{Ru}(\text{Ida}2\text{P})]^{2-}$  complex.

|                                                  |               |
|--------------------------------------------------|---------------|
| Electronic Energy (Eh)                           | -1752.1410875 |
| Sum of electronic and zero-point Energies (Eh)   | -1751.822104  |
| Sum of electronic and thermal Energies (Eh)      | -1751.799509  |
| Sum of electronic and enthalpy Energies (Eh)     | -1751.798565  |
| Sum of electronic and thermal Free Energies (Eh) | -1751.873309  |
| Number of Imaginary Frequencies                  | 0             |

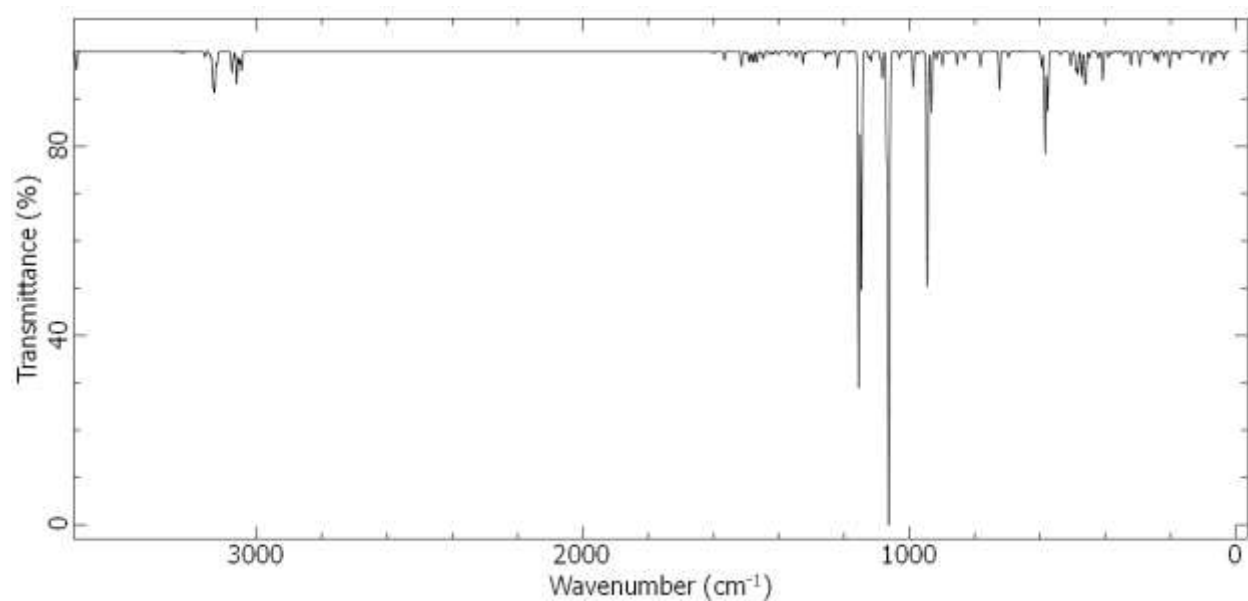

### Molecular Geometry in Cartesian Coordinates

|    |           |           |           |
|----|-----------|-----------|-----------|
| Ru | 0.196949  | -0.354874 | 0.127983  |
| C  | 2.082176  | -0.039880 | 1.176613  |
| C  | 1.184931  | -0.660529 | 2.050829  |
| C  | 0.525764  | -1.873559 | 1.685871  |
| C  | 0.813758  | -2.422865 | 0.426735  |
| C  | 1.741732  | -1.799746 | -0.456341 |
| C  | 2.375585  | -0.601104 | -0.106423 |
| H  | 2.496533  | 0.924951  | 1.437389  |
| H  | 0.922583  | -0.173159 | 2.980476  |
| H  | 0.266029  | -3.293112 | 0.091770  |
| H  | 1.871625  | -2.212445 | -1.446272 |
| C  | 3.292594  | 0.148039  | -1.040546 |
| H  | 3.165149  | 1.208241  | -0.806908 |
| C  | 2.956660  | -0.052981 | -2.512272 |
| H  | 1.903907  | 0.159327  | -2.708805 |
| H  | 3.562067  | 0.619758  | -3.121513 |
| H  | 3.169212  | -1.073478 | -2.838190 |
| C  | 4.741207  | -0.235988 | -0.737394 |
| H  | 5.423334  | 0.346716  | -1.358991 |
| H  | 4.990187  | -0.050361 | 0.309258  |
| H  | 4.908221  | -1.295581 | -0.946748 |
| C  | -0.464252 | -2.509318 | 2.606652  |
| H  | 0.061247  | -3.156071 | 3.313157  |
| H  | -1.003145 | -1.756449 | 3.183084  |
| H  | -1.180262 | -3.114335 | 2.052164  |
| C  | -2.761358 | 0.458156  | 0.024763  |
| H  | -3.715715 | 0.486644  | 0.555931  |
| H  | -2.690138 | 1.355672  | -0.589741 |
| N  | -1.638988 | 0.458135  | 0.986426  |
| H  | -1.895811 | -0.138372 | 1.764826  |
| C  | -1.323942 | 1.803844  | 1.505294  |
| H  | -0.711077 | 1.678468  | 2.397572  |
| H  | -2.239462 | 2.330688  | 1.789368  |



|   |           |           |           |
|---|-----------|-----------|-----------|
| P | -0.358933 | 2.767727  | 0.251982  |
| O | 0.761756  | 3.463846  | 0.997384  |
| O | -1.293377 | 3.700328  | -0.489644 |
| O | 0.158611  | 1.639203  | -0.687505 |
| P | -2.606499 | -0.983403 | -1.088020 |
| O | -2.857138 | -2.238473 | -0.274186 |
| O | -1.111857 | -0.838914 | -1.505981 |
| O | -3.533616 | -0.787098 | -2.264591 |

**Table S7.** ESI-MS measured and calculated m/z values of the complexed species registered in the positive mode for the various metal ion - ligand systems at various pH values.

|                                                                                 | m/z measured | m/z calculated | pH-range     |
|---------------------------------------------------------------------------------|--------------|----------------|--------------|
| $[(\eta^5\text{-Cp}^*)\text{Rh}(\text{Ida})] + \text{H}^+$                      | 371.058      | 371.055        | 3.06         |
| $[(\eta^5\text{-Cp}^*)\text{Rh}(\text{Ida})] + \text{K}^+$                      | 408.013      | 408.008        | 3.06 – 10.11 |
| $[(\eta^5\text{-Cp}^*)\text{Rh}(\text{Ida})]_2 + \text{H}^+$                    | 739.104      | 739.097        | 2.88 – 3.06  |
| $[(\eta^5\text{-Cp}^*)\text{Rh}(\text{Ida})]_2 + \text{K}^+$                    | 777.060      | 777.053        | 3.06 – 4.34  |
| $[(\eta^5\text{-Cp}^*)\text{Rh}(\text{IdaPH})] + \text{H}^+$                    | 406.029      | 406.033        | 2.36         |
| $[(\eta^5\text{-Cp}^*)\text{Rh}(\text{IdaPH})] + \text{K}^+$                    | 443.988      | 443.984        | 2.36 – 10.44 |
| $[(\eta^5\text{-Cp}^*)\text{Rh}(\text{IdaPK})]\text{KNO}_3 + \text{K}^+$        | 582.895      | 582.892        | 2.36 – 10.44 |
| $[(\eta^5\text{-Cp}^*)\text{Rh}(\text{IdaPH})]_2 + \text{H}^+$                  | 811.057      | 811.050        | 2.36         |
| $[(\eta^5\text{-Cp}^*)\text{Rh}(\text{IdaPH})]_2 + \text{K}^+$                  | 849.009      | 849.006        | 2.36 – 10.44 |
| $[(\eta^5\text{-Cp}^*)\text{Rh}(\text{Ida2PH}_2)] + \text{H}^+$                 | 442.009      | 442.005        | 2.40 – 4.17  |
| $[(\eta^5\text{-Cp}^*)\text{Rh}(\text{Ida2PH}_2)] + \text{K}^+$                 | 479.965      | 480.005        | 2.40 – 10.27 |
| $[(\eta^5\text{-Cp}^*)\text{Rh}(\text{Ida2PH}_2)]\text{KNO}_3 + \text{K}^+$     | 580.956      | 580.912        | 2.40 – 2.57  |
| $[(\eta^5\text{-Cp}^*)\text{Rh}]_2(\text{Ida2P}) + \text{H}^+$                  | 678.016      | 678.012        | 2.40 – 8.21  |
| $[(\eta^5\text{-Cp}^*)\text{Rh}(\text{Ida2PH}_2)]_2 + \text{K}^+$               | 920.963      | 920.959        | 2.40 – 4.17  |
| $[(\eta^5\text{-Cp}^*)\text{Ir}(\text{Ida})] + \text{H}^+$                      | 460.114      | 460.110        | 2.58         |
| $[(\eta^5\text{-Cp}^*)\text{Ir}(\text{Ida})] + \text{K}^+$                      | 498.070      | 498.065        | 2.58 – 10.13 |
| $[(\eta^5\text{-Cp}^*)\text{Ir}(\text{Ida})]\text{KNO}_3 + \text{K}^+$          | 599.023      | 599.017        | 2.58 – 10.13 |
| $[(\eta^5\text{-Cp}^*)\text{Ir}(\text{Ida})]_2 + \text{K}^+$                    | 957.176      | 957.167        | 2.58 – 10.15 |
| $[(\eta^5\text{-Cp}^*)\text{Ir}(\text{IdaPH})] + \text{H}^+$                    | 496.091      | 496.086        | 2.52         |
| $[(\eta^5\text{-Cp}^*)\text{Ir}(\text{IdaPH})] + \text{K}^+$                    | 534.047      | 534.042        | 2.52 – 10.13 |
| $[(\eta^5\text{-Cp}^*)\text{Ir}(\text{IdaP})\text{K}] + \text{H}^+$             | 572.004      | 571.997        | 2.52 – 10.13 |
| $[(\eta^5\text{-Cp}^*)\text{Ir}(\text{IdaP})\text{K}]\text{KNO}_3 + \text{K}^+$ | 672.956      | 672.949        | 2.52 – 10.13 |
| $[(\eta^5\text{-Cp}^*)\text{Ir}(\text{IdaPH})]_2 + \text{H}^+$                  | 991.174      | 991.165        | 2.52         |
| $[(\eta^5\text{-Cp}^*)\text{Ir}(\text{IdaPH})]_2 + \text{K}^+$                  | 1029.130     | 1029.120       | 3.76         |
| $[(\eta^5\text{-Cp}^*)\text{Ir}(\text{Ida2PH}_2)] + \text{H}^+$                 | 532.069      | 532.063        | 2.60 – 4.52  |
| $[(\eta^5\text{-Cp}^*)\text{Ir}(\text{Ida2PH}_2)] + \text{K}^+$                 | 570.025      | 570.018        | 2.60 – 10.45 |
| $[(\eta^5\text{-Cp}^*)\text{Ir}(\text{Ida2P})\text{K}_2] + \text{H}^+$          | 607.981      | 607.974        | 2.60 – 10.45 |
| $[(\eta^5\text{-Cp}^*)\text{Ir}(\text{Ida2PH}_2)] + \text{H}^+$                 | 645.936      | 645.930        | 4.52 – 10.45 |

|                                                                                 |          |          |              |
|---------------------------------------------------------------------------------|----------|----------|--------------|
| $[(\eta^5\text{-Cp}^*)\text{Rh}(\text{Ida2PH}_2)]_2 + \text{H}^+$               | 1063.129 | 1063.118 | 2.60 – 2.92  |
| $[(\eta^6\text{-}p\text{-cym})\text{Os}(\text{Ida})] + \text{H}^+$              | 458.100  | 458.104  | 2.63         |
| $[(\eta^6\text{-}p\text{-cym})\text{Os}(\text{Ida})] + \text{K}^+$              | 496.060  | 496.056  | 3.57 – 10.44 |
| $[(\eta^6\text{-}p\text{-cym})\text{Os}(\text{Ida})]\text{KNO}_3 + \text{K}^+$  | 597.011  | 597.007  | 2.63 – 3.57  |
| $[(\eta^6\text{-}p\text{-cym})\text{Os}(\text{Ida})]_2 + \text{H}^+$            | 915.197  | 915.193  | 2.63 – 3.57  |
| $[(\eta^6\text{-}p\text{-cym})\text{Os}(\text{Ida})]_2 + \text{K}^+$            | 953.152  | 953.149  | 2.63         |
| $[(\eta^6\text{-}p\text{-cym})\text{Os}(\text{IdaPH})] + \text{H}^+$            | 494.081  | 494.077  | 2.45         |
| $[(\eta^6\text{-}p\text{-cym})\text{Os}(\text{IdaPH})] + \text{K}^+$            | 532.037  | 532.032  | 2.45 – 10.38 |
| $[(\eta^6\text{-}p\text{-cym})\text{Os}(\text{IdaPK})] + \text{K}^+$            | 569.992  | 569.988  | 2.45 – 10.38 |
| $[(\eta^6\text{-}p\text{-cym})\text{Os}(\text{IdaPH})]_2 + \text{H}^+$          | 987.150  | 987.146  | 2.45         |
| $[(\eta^6\text{-}p\text{-cym})\text{Os}(\text{IdaPH})]_2 + \text{K}^+$          | 1025.106 | 1025.102 | 10.38        |
| $[(\eta^6\text{-}p\text{-cym})\text{Os}(\text{Ida2PH}_2)] + \text{H}^+$         | 530.058  | 530.053  | 2.44         |
| $[(\eta^6\text{-}p\text{-cym})\text{Os}(\text{Ida2PH}_2)] + \text{K}^+$         | 568.014  | 568.009  | 2.44 – 10.45 |
| $[(\eta^6\text{-}p\text{-cym})\text{Os}(\text{Ida2PH})\text{K}] + \text{K}^+$   | 605.970  | 605.965  | 2.44 – 10.45 |
| $[(\eta^6\text{-}p\text{-cym})\text{Os}(\text{Ida2P})\text{K}_2] + \text{K}^+$  | 643.925  | 643.920  | 4.03         |
| $[(\eta^6\text{-}p\text{-cym})\text{Os}]_2(\text{Ida2P}) + \text{H}^+$          | 854.114  | 854.109  | 2.44         |
| $[(\eta^6\text{-}p\text{-cym})\text{Os}(\text{Ida2PH}_2)]_2 + \text{H}^+$       | 1059.104 | 1059.099 | 2.44         |
| $[(\eta^6\text{-}p\text{-cym})\text{Ru}(\text{Ida})] + \text{H}^+$              | 368.041  | 368.043  | 2.98         |
| $[(\eta^6\text{-}p\text{-cym})\text{Ru}(\text{Ida})] + \text{K}^+$              | 405.999  | 405.999  | 2.98 – 9.04  |
| $[(\eta^6\text{-}p\text{-cym})\text{Ru}(\text{Ida})]_2 + \text{K}^+$            | 773.032  | 773.035  | 6.76 – 9.04  |
| $[(\eta^6\text{-}p\text{-cym})\text{Ru}(\text{Ida})]\text{KNO}_3 + \text{K}^+$  | 506.950  | 506.951  | 2.98 – 6.76  |
| $[(\eta^6\text{-}p\text{-cym})\text{Ru}(\text{IdaPH})] + \text{H}^+$            | 404.012  | 404.020  | 2.54 – 3.07  |
| $[(\eta^6\text{-}p\text{-cym})\text{Ru}(\text{IdaPH})] + \text{K}^+$            | 441.968  | 441.976  | 2.54 – 5.60  |
| $[(\eta^6\text{-}p\text{-cym})\text{Ru}(\text{IdaPK})] + \text{K}^+$            | 479.931  | 479.932  | 5.60 – 9.99  |
| $[(\eta^6\text{-}p\text{-cym})\text{Ru}(\text{IdaP})]\text{KNO}_3 + \text{K}^+$ | 580.880  | 580.883  | 9.59 – 9.99  |
| $[(\eta^6\text{-}p\text{-cym})\text{Ru}(\text{Ida2PH}_2)] + \text{H}^+$         | 439.986  | 439.996  | 2.48         |
| $[(\eta^6\text{-}p\text{-cym})\text{Ru}(\text{Ida2PH}_2)] + \text{K}^+$         | 477.938  | 477.952  | 2.48 – 4.09  |
| $[(\eta^6\text{-}p\text{-cym})\text{Ru}(\text{Ida2PH})\text{K}] + \text{H}^+$   | 515.894  | 515.908  | 4.09 – 9.80  |
| $[(\eta^6\text{-}p\text{-cym})\text{Ru}(\text{Ida2P})\text{K}_2] + \text{K}^+$  | 553.843  | 553.864  | 7.91 – 9.80  |
